# Supplementary figures and images for: Down-Regulation of the Proteoglycan Decorin Fills in the Tumor-Promoting Phenotype of Ionizing Radiation-Induced Senescent Human Breast Stromal Fibroblasts
Source: MDPI journal article supplement (doi:10.3390/cancers13081987), 2021-04-20

# Original images of blots and densitometric analysis

## Figure 1C

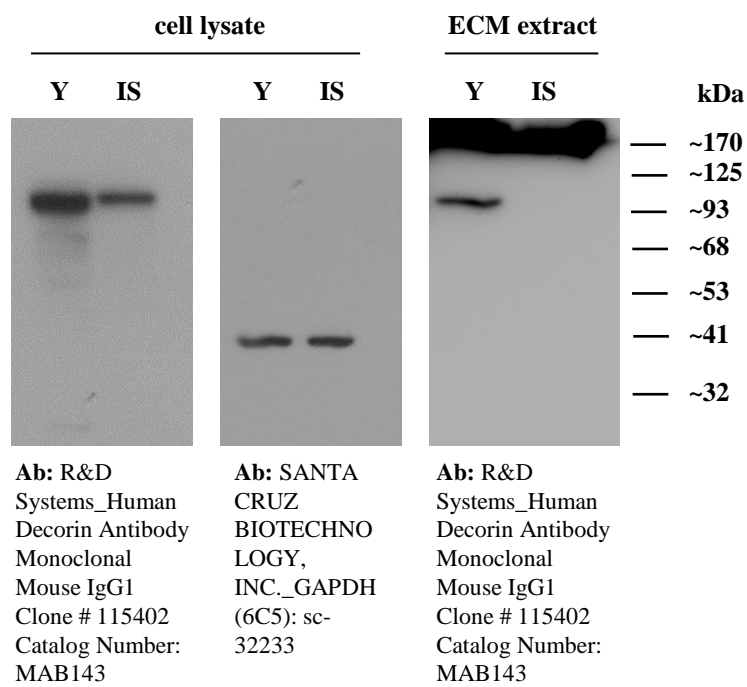

### Densitometric analysis

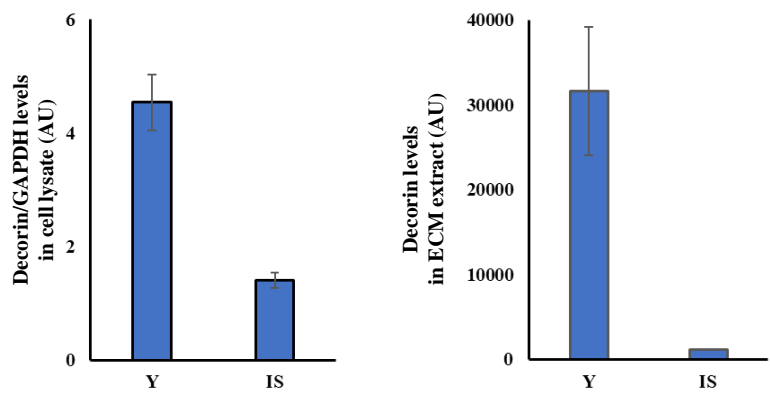

Supplement: s1 [file s1]
